# Supplementary material for: Pentoxifylline Alone or in Combination with Gentamicin or Vancomycin Inhibits Live Microbe-Induced Proinflammatory Cytokine Production in Human Cord Blood and Cord Blood Monocytes In Vitro
Source: PubMed Central journal article supplement (PMC6256750; doi:10.1128/aac.01462-18), 2018-11-26
Supplement: zac012187661s1.pdf [file zac012187661s1.pdf]

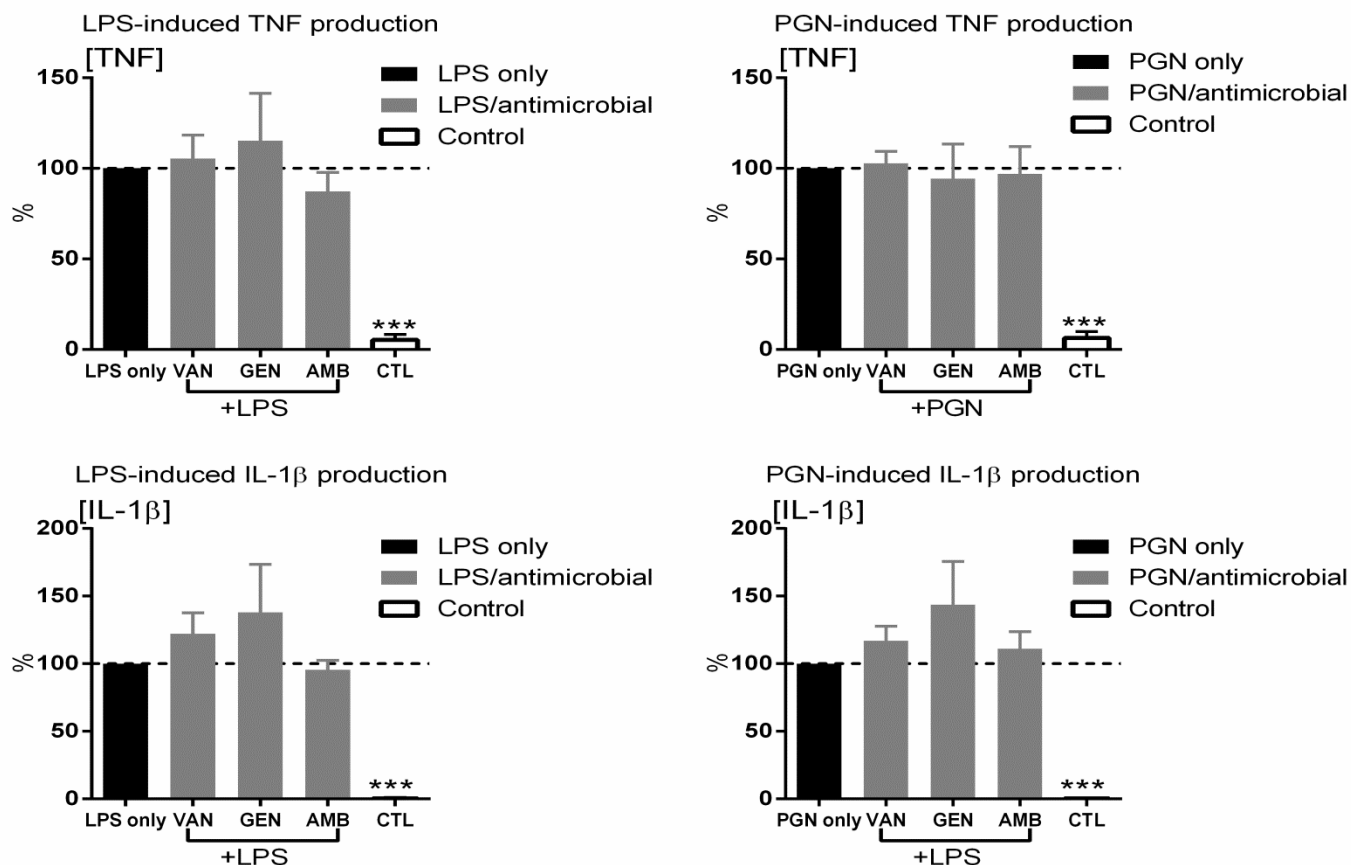

**FIG S1: No intrinsic anti-inflammatory effects of VAN, GEN and AMB on TLR agonist-induced cytokine production in human cord blood.** Whole cord blood (n=5) was stimulated with TLR2 (PGN 10  $\mu$ g/ml) or TLR4 (LPS 10 ng/ml) agonists and simultaneously treated with VAN, GEN, AMB, or vehicle control. Samples were cultured for 6 hours in 5% CO<sub>2</sub> at 37° C. Samples treated with antimicrobial agents were expressed as a percentage compared to samples stimulated with TLR agonists only (reference samples), which were defined as 100%. Significant differences of treated samples compared to the corresponding reference samples were indicated: \*p<0.05, \*\*p<0.01, \*\*\*p<0.001.

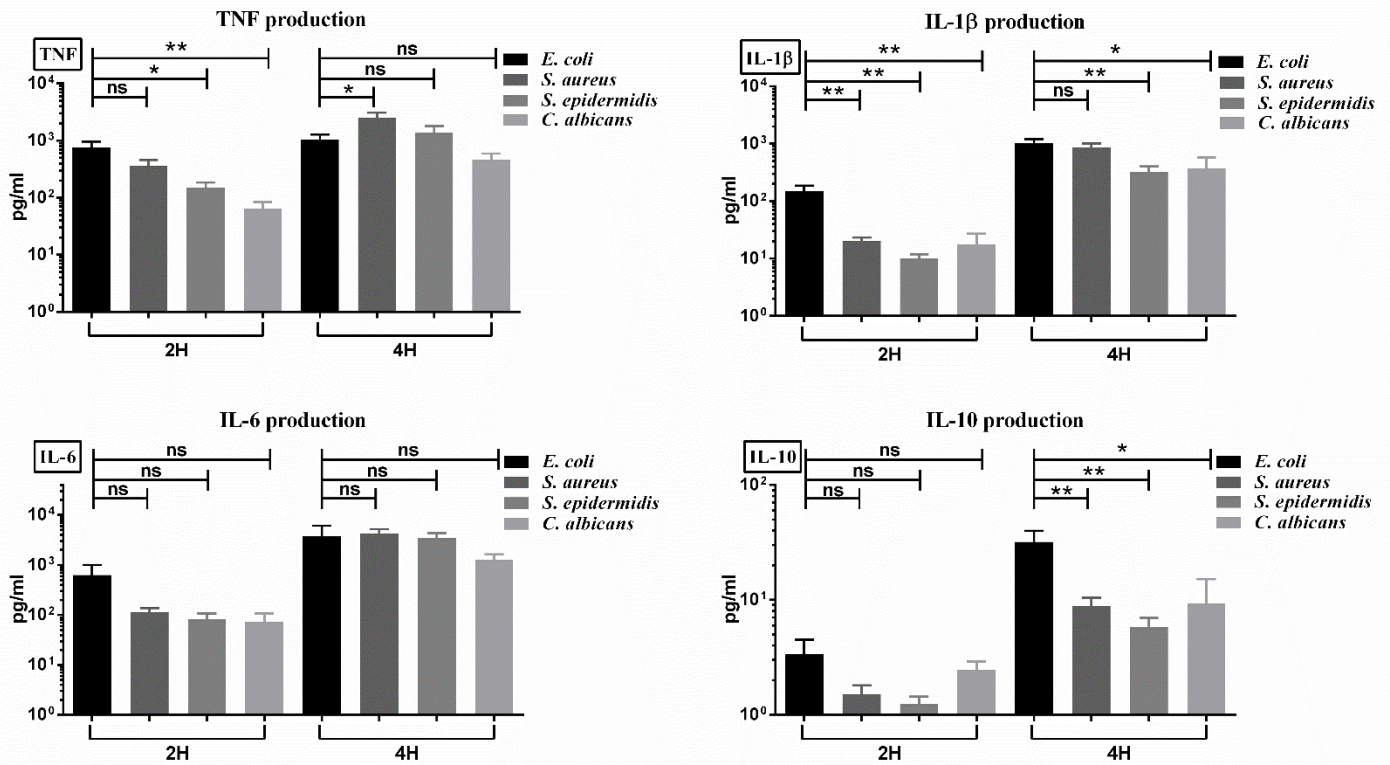

**FIG S2: Microbe-induced cytokine production in term human cord blood.** Whole cord blood (n=10 to 13) was stimulated with live microorganisms:  $10^4$  CFU/ml *E. coli*,  $10^5$  CFU/ml *S. aureus*,  $10^5$  CFU/ml *S. epidermidis*, and  $10^5$  CFU/ml *C. albicans*, and cultured for 2 or 4 hours in 5% CO<sub>2</sub> at 37°C. Supernatant cytokines were measured with multiplex immunoassays, and comparisons of cytokine concentrations from *E. coli*-stimulated vs *S. aureus*-, *S. epidermidis*- or *C. albicans*-stimulated blood samples are shown. Significant differences based on paired t tests were indicated: \*p<0.05, \*\*p<0.01, \*\*\*p<0.001.

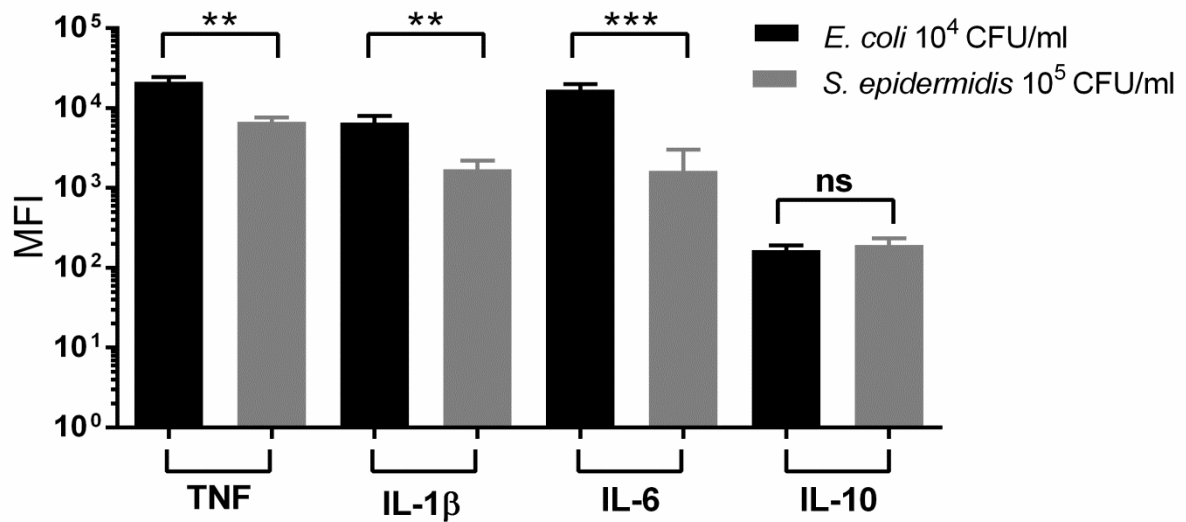

**FIG S3: Microbe-induced intracellular cytokine staining in CD14<sup>+</sup>CD45<sup>+</sup> cord blood monocytes.** Whole cord blood (n=10) was stimulated with live *E. coli* or *S. epidermidis*, and cultured for 4 hours in 5% CO<sub>2</sub> at 37°C. Samples were subjected to intracellular cytokine-staining for flow cytometry. Comparisons of MFI values from *E. coli*-stimulated vs *S. epidermidis*-stimulated blood samples are shown. Significant differences based on paired t tests were indicated: \*p<0.05, \*\*p<0.01, \*\*\*p<0.001.

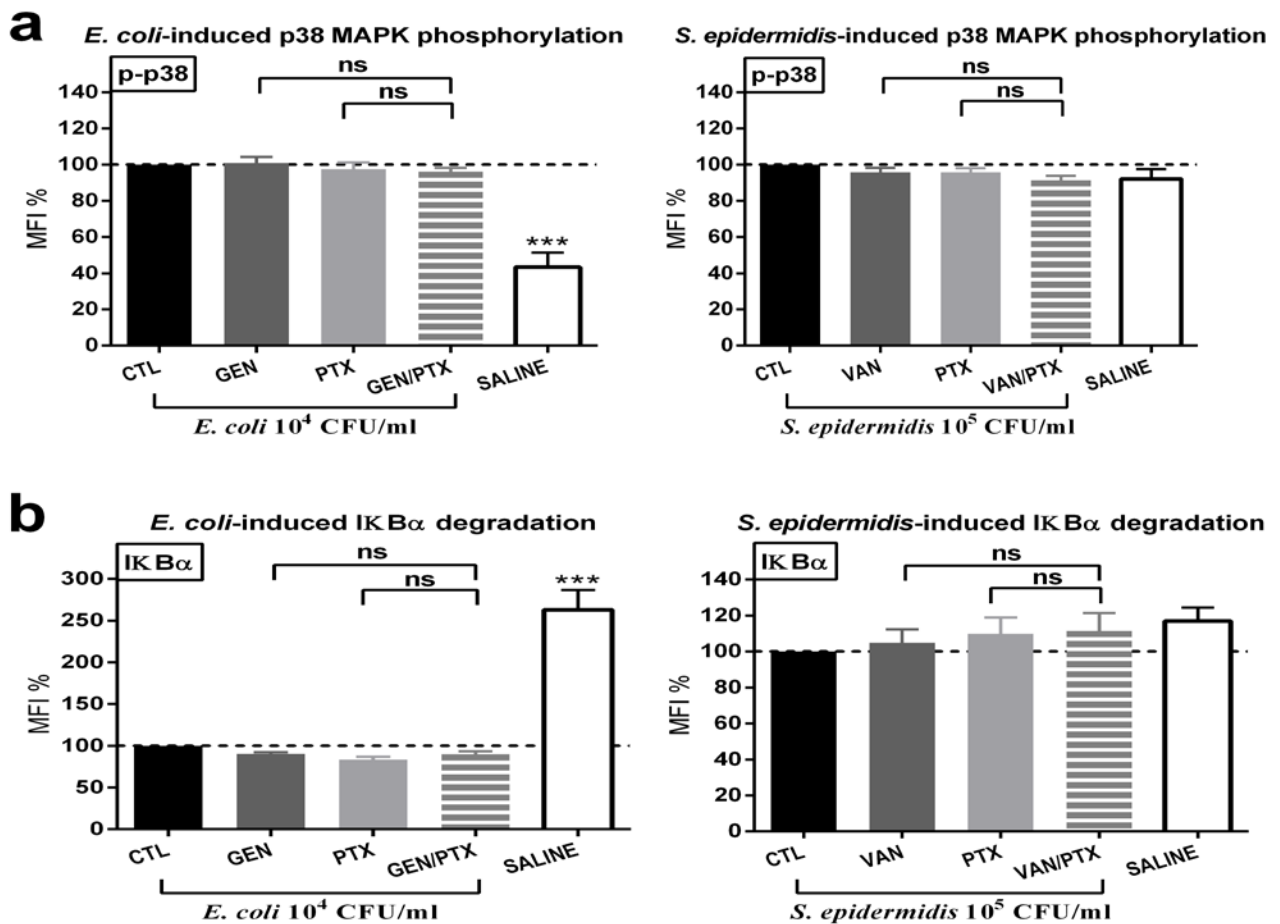

**FIG S4: Lack of inhibition of *E. coli*- and *S. epidermidis*-induced MAPK p38 phosphorylation and IκBα degradation in cord blood monocytes in the presence of PTX and/or antibiotics.** Whole cord blood (n=10) was stimulated with live *E. coli* or *S. epidermidis*, treated with 200 μM PTX and/or antibiotics or vehicle control, and cultured for 30 min in 5% CO<sub>2</sub> at 37°C. Samples were subjected to intracellular staining for a) phosphorylated p38 MAPK and b) total IκBα for flow cytometric MFI measurements. Comparisons of MFI values from *E. coli*-stimulated vs *S. epidermidis*-stimulated blood samples are shown. Significant differences between treated compared to untreated samples and between samples treated with single (antimicrobial or anti-inflammatory) agents compared to combination treatment based on linear mixed model t tests, adjusted for multiple comparisons employing false discovery rates, were indicated: \*p<0.05, \*\*p<0.01, \*\*\*p<0.001.

**Table S1: PTX and antimicrobial agents alone or combined inhibited mRNA gene expression of pro-inflammatory cytokines in newborn cord blood**

| Gene        | Microorganism         | Culture duration | Mean $\Delta\Delta\text{CT}$ (compared to microbial stimulation alone) |       |                            |       |                                  |       |
|-------------|-----------------------|------------------|------------------------------------------------------------------------|-------|----------------------------|-------|----------------------------------|-------|
|             |                       |                  | PTX <sup>a</sup>                                                       |       | ANTIMICROBIAL <sup>a</sup> |       | PTX + ANTIMICROBIAL <sup>a</sup> |       |
| <i>TNF</i>  | <i>E. coli</i>        | 1H               | ↓↓                                                                     | 1.58  | ∅                          | 0.40  | ↓↓                               | 1.92  |
|             |                       | 2H               | ↓                                                                      | 2.12  | ↓                          | 1.59  | ↓↓                               | 2.34  |
|             | <i>S. aureus</i>      | 1H               | ↓                                                                      | 1.20  | ∅                          | -0.16 | ↓                                | 0.82  |
|             |                       | 2H               | ↓                                                                      | 0.83  | ↓↓                         | 1.18  | ↓↓↓                              | 2.36  |
|             | <i>S. epidermidis</i> | 1H               | ∅                                                                      | 0.84  | ∅                          | 0.42  | ∅                                | 0.95  |
|             |                       | 2H               | ∅                                                                      | 1.11  | ↓                          | 1.57  | ↓                                | 1.93  |
|             | <i>C. albicans</i>    | 1H               | ↓                                                                      | 0.74  | ∅                          | -0.63 | ∅                                | 0.82  |
|             |                       | 2H               | ↓↓                                                                     | 0.98  | ∅                          | -0.36 | ↓                                | 0.86  |
| <i>IL1B</i> | <i>E. coli</i>        | 1H               | ∅                                                                      | 0.56  | ∅                          | 0.47  | ∅                                | 0.89  |
|             |                       | 2H               | ∅                                                                      | 0.82  | ↓                          | 1.20  | ↓                                | 0.87  |
|             | <i>S. aureus</i>      | 1H               | ∅                                                                      | 0.75  | ∅                          | -0.38 | ∅                                | 0.15  |
|             |                       | 2H               | ∅                                                                      | 0.24  | ↓↓                         | 0.90  | ↓↓                               | 1.31  |
|             | <i>S. epidermidis</i> | 1H               | ∅                                                                      | 0.36  | ∅                          | 0.82  | ∅                                | 0.83  |
|             |                       | 2H               | ∅                                                                      | 0.64  | ↓                          | 1.80  | ↓                                | 1.50  |
|             | <i>C. albicans</i>    | 1H               | ↓                                                                      | 0.77  | ∅                          | -0.33 | ∅                                | 0.54  |
|             |                       | 2H               | ∅                                                                      | 0.61  | ∅                          | 0.04  | ∅                                | 0.40  |
| <i>IL6</i>  | <i>E. coli</i>        | 1H               | ∅                                                                      | 0.48  | ∅                          | 0.74  | ∅                                | 0.75  |
|             |                       | 2H               | ∅                                                                      | 1.01  | ↓                          | 1.80  | ↓                                | 1.41  |
|             | <i>S. aureus</i>      | 1H               | ∅                                                                      | -0.63 | ∅                          | -0.91 | ↑                                | -1.32 |
|             |                       | 2H               | ∅                                                                      | -0.36 | ↓↓                         | 1.13  | ↓                                | 1.08  |
|             | <i>S. epidermidis</i> | 1H               | ∅                                                                      | -0.81 | ∅                          | 0.64  | ∅                                | -0.83 |
|             |                       | 2H               | ∅                                                                      | 0.13  | ↓↓                         | 2.98  | ∅                                | 1.85  |
|             | <i>C. albicans</i>    | 1H               | ↑↑                                                                     | -1.12 | ↑                          | -1.70 | ↑                                | -1.91 |
|             |                       | 2H               | ∅                                                                      | -0.41 | ∅                          | -1.06 | ↑                                | -1.64 |
| <i>IL10</i> | <i>E. coli</i>        | 1H               | ∅                                                                      | -0.23 | ∅                          | 0.17  | ∅                                | 0.07  |
|             |                       | 2H               | ∅                                                                      | 0.98  | ∅                          | 1.22  | ∅                                | 0.82  |
|             | <i>S. aureus</i>      | 1H               | ∅                                                                      | 0.50  | ∅                          | -0.14 | ∅                                | 0.31  |
|             |                       | 2H               | ∅                                                                      | -0.57 | ∅                          | -0.59 | ∅                                | -0.26 |
|             | <i>S. epidermidis</i> | 1H               | ∅                                                                      | 0.13  | ∅                          | -0.15 | ∅                                | -0.21 |
|             |                       | 2H               | ∅                                                                      | 0.20  | ∅                          | 0.13  | ∅                                | -0.31 |
|             | <i>C. albicans</i>    | 1H               | ∅                                                                      | -0.52 | ∅                          | -0.30 | ∅                                | -0.05 |
|             |                       | 2H               | ∅                                                                      | -0.33 | ↑                          | -0.65 | ∅                                | -0.59 |
| <i>TLR2</i> | <i>E. coli</i>        | 1H               | ∅                                                                      | 0.40  | ∅                          | 0.30  | ∅                                | 0.44  |
|             |                       | 2H               | ↓                                                                      | 1.12  | ∅                          | 0.66  | ∅                                | 0.71  |
|             | <i>S. aureus</i>      | 1H               | ∅                                                                      | 0.25  | ∅                          | -0.07 | ∅                                | 0.11  |
|             |                       | 2H               | ∅                                                                      | 0.60  | ∅                          | 0.14  | ∅                                | 0.60  |
|             | <i>S. epidermidis</i> | 1H               | ∅                                                                      | 0.16  | ∅                          | 0.18  | ∅                                | -0.33 |
|             |                       | 2H               | ∅                                                                      | 0.41  | ∅                          | 0.41  | ∅                                | 0.54  |
|             | <i>C. albicans</i>    | 1H               | ∅                                                                      | -0.02 | ∅                          | -0.13 | ∅                                | 0.06  |

|               |                       |    |   |       |   |       |   |       |
|---------------|-----------------------|----|---|-------|---|-------|---|-------|
|               |                       | 2H | ∅ | 0.51  | ∅ | -0.08 | ∅ | 0.41  |
| <i>TLR4</i>   | <i>E. coli</i>        | 1H | ∅ | 0.45  | ∅ | -0.38 | ∅ | 0.03  |
|               |                       | 2H | ∅ | 0.45  | ∅ | -0.38 | ∅ | 0.03  |
|               | <i>S. aureus</i>      | 1H | ∅ | 0.30  | ∅ | -0.14 | ∅ | 0.32  |
|               |                       | 2H | ∅ | 0.30  | ∅ | -0.14 | ∅ | 0.32  |
|               | <i>S. epidermidis</i> | 1H | ∅ | 0.00  | ∅ | -0.32 | ∅ | -0.94 |
|               |                       | 2H | ∅ | 0.00  | ∅ | -0.32 | ∅ | -0.94 |
|               | <i>C. albicans</i>    | 1H | ∅ | 0.05  | ∅ | -0.79 | ∅ | 0.44  |
|               |                       | 2H | ∅ | 0.05  | ∅ | -0.79 | ∅ | 0.44  |
| <i>RELA</i>   | <i>E. coli</i>        | 1H | ∅ | 0.12  | ∅ | -0.43 | ∅ | 0.03  |
|               |                       | 2H | ∅ | 0.90  | ∅ | 1.10  | ∅ | 0.63  |
|               | <i>S. aureus</i>      | 1H | ∅ | -0.04 | ∅ | -0.19 | ∅ | -0.14 |
|               |                       | 2H | ∅ | 0.03  | ∅ | 0.06  | ∅ | 0.17  |
|               | <i>S. epidermidis</i> | 1H | ∅ | -0.26 | ∅ | -0.36 | ∅ | -0.78 |
|               |                       | 2H | ∅ | -0.17 | ∅ | -0.09 | ∅ | -0.53 |
|               | <i>C. albicans</i>    | 1H | ∅ | -0.46 | ∅ | -0.65 | ∅ | 0.01  |
|               |                       | 2H | ∅ | -0.41 | ∅ | -0.13 | ∅ | -0.48 |
| <i>NFKBIA</i> | <i>E. coli</i>        | 1H | ∅ | 0.06  | ∅ | -0.20 | ∅ | 0.10  |
|               |                       | 2H | ∅ | 1.08  | ∅ | 1.07  | ∅ | 1.03  |
|               | <i>S. aureus</i>      | 1H | ∅ | 0.03  | ∅ | -0.45 | ∅ | -0.13 |
|               |                       | 2H | ∅ | 0.51  | ↓ | 0.50  | ↓ | 1.04  |
|               | <i>S. epidermidis</i> | 1H | ∅ | 0.08  | ∅ | 0.18  | ∅ | -0.24 |
|               |                       | 2H | ∅ | 0.33  | ∅ | 0.83  | ∅ | 0.81  |
|               | <i>C. albicans</i>    | 1H | ∅ | -1.01 | ∅ | -0.42 | ∅ | -0.25 |
|               |                       | 2H | ∅ | 0.00  | ∅ | 0.21  | ∅ | 0.28  |
| <i>DUSP1</i>  | <i>E. coli</i>        | 1H | ∅ | -0.07 | ∅ | 0.10  | ∅ | 0.15  |
|               |                       | 2H | ∅ | 0.18  | ∅ | 0.97  | ∅ | 0.28  |
|               | <i>S. aureus</i>      | 1H | ∅ | -0.36 | ∅ | -0.26 | ∅ | -0.51 |
|               |                       | 2H | ∅ | -0.03 | ↓ | 0.83  | ∅ | 0.63  |
|               | <i>S. epidermidis</i> | 1H | ∅ | -0.29 | ∅ | 0.51  | ∅ | -0.26 |
|               |                       | 2H | ∅ | -0.21 | ∅ | 0.53  | ∅ | 0.00  |
|               | <i>C. albicans</i>    | 1H | ∅ | -0.04 | ∅ | 0.42  | ∅ | 0.23  |
|               |                       | 2H | ∅ | -0.10 | ↓ | 0.67  | ∅ | 0.20  |
| <i>CASP1</i>  | <i>E. coli</i>        | 1H | ∅ | 0.40  | ∅ | 0.17  | ∅ | 0.43  |
|               |                       | 2H | ∅ | 0.85  | ∅ | 0.85  | ∅ | 0.59  |
|               | <i>S. aureus</i>      | 1H | ∅ | 0.11  | ∅ | -0.38 | ∅ | 0.09  |
|               |                       | 2H | ∅ | 0.21  | ∅ | -0.05 | ∅ | 0.22  |
|               | <i>S. epidermidis</i> | 1H | ∅ | 0.35  | ∅ | 0.43  | ∅ | 0.12  |
|               |                       | 2H | ∅ | 0.09  | ∅ | 0.08  | ∅ | -0.06 |
|               | <i>C. albicans</i>    | 1H | ∅ | 0.42  | ∅ | 0.25  | ∅ | 0.47  |
|               |                       | 2H | ∅ | 0.17  | ∅ | -0.14 | ∅ | -0.10 |
| <i>NLRP3</i>  | <i>E. coli</i>        | 1H | ∅ | 0.10  | ∅ | 0.35  | ∅ | 0.26  |
|               |                       | 2H | ∅ | 0.30  | ∅ | 0.92  | ∅ | 0.35  |
|               | <i>S. aureus</i>      | 1H | ∅ | -0.01 | ∅ | -0.36 | ∅ | -0.25 |
|               |                       | 2H | ∅ | 0.01  | ↓ | 1.17  | ∅ | 0.97  |

|  |                       |    |   |       |   |       |   |       |
|--|-----------------------|----|---|-------|---|-------|---|-------|
|  | <i>S. epidermidis</i> | 1H | ∅ | 0.06  | ∅ | 0.57  | ∅ | 0.12  |
|  |                       | 2H | ∅ | -0.08 | ∅ | 1.13  | ∅ | 0.61  |
|  | <i>C. albicans</i>    | 1H | ∅ | 0.26  | ∅ | -0.17 | ∅ | -0.11 |
|  |                       | 2H | ∅ | 0.07  | ∅ | 0.03  | ∅ | -0.25 |

Cord blood (n=10) was stimulated with live microorganisms (*E. coli* 10<sup>4</sup> CFU/ml, *S. aureus* 10<sup>5</sup> CFU/ml, *S. epidermidis* 10<sup>5</sup> CFU/ml, *C. albicans* 10<sup>5</sup> CFU/ml) and simultaneously treated with PTX (200 µM), antimicrobial agents (GEN, VAN or AMB), or combined PTX and antimicrobial agents, and cultured for 1 or 2 hours at 37 ° in 5% CO<sub>2</sub>. Mean  $\Delta\Delta C_T$  values of samples undergoing different treatment conditions compared to microbial stimulation alone (reference samples). ↑ significant upregulation, ↓ significant downregulation, and ∅ unchanged mRNA expression compared to reference samples, with the number of symbols representing the level of significance ( $p \leq 0.05$ ,  $p \leq 0.01$ , and  $p \leq 0.001$ , respectively).

<sup>a</sup> p-values were based on linear mixed model t-tests and adjusted for multiple comparisons employing false discovery rates.

**Table S2: Effects of combined PTX and antimicrobial treatment vs PTX or antimicrobial agents alone on microbial-induced gene expression in cord blood**

| Gene          | Microorganism         | mRNA expression changes of PTX + antimicrobial agents (Mean $\Delta\Delta CT$ ) |       |         |       |                                           |       |         |       |
|---------------|-----------------------|---------------------------------------------------------------------------------|-------|---------|-------|-------------------------------------------|-------|---------|-------|
|               |                       | vs PTX alone <sup>a</sup>                                                       |       |         |       | vs antimicrobial agent alone <sup>a</sup> |       |         |       |
|               |                       | 1 hour                                                                          |       | 2 hours |       | 1 hour                                    |       | 2 hours |       |
| <b>TNF</b>    | <i>E. coli</i>        | ∅                                                                               | 0.34  | ∅       | 0.22  | ↓                                         | 1.53  | ∅       | 0.74  |
|               | <i>S. aureus</i>      | ∅                                                                               | -0.38 | ↓↓      | 1.53  | ↓                                         | 0.98  | ↓↓      | 1.18  |
|               | <i>S. epidermidis</i> | ∅                                                                               | 0.11  | ∅       | 0.81  | ∅                                         | 0.54  | ∅       | 0.35  |
|               | <i>C. albicans</i>    | ∅                                                                               | 0.09  | ∅       | -0.12 | ↓                                         | 1.45  | ↓↓↓     | 1.22  |
| <b>IL1B</b>   | <i>E. coli</i>        | ∅                                                                               | 0.33  | ∅       | 0.05  | ∅                                         | 0.43  | ∅       | -0.33 |
|               | <i>S. aureus</i>      | ∅                                                                               | -0.60 | ↓↓      | 1.06  | ∅                                         | 0.53  | ∅       | 0.41  |
|               | <i>S. epidermidis</i> | ∅                                                                               | 0.47  | ∅       | 0.86  | ∅                                         | 0.01  | ∅       | -0.29 |
|               | <i>C. albicans</i>    | ∅                                                                               | -0.23 | ∅       | -0.21 | ∅                                         | 0.88  | ∅       | 0.37  |
| <b>IL6</b>    | <i>E. coli</i>        | ∅                                                                               | 0.27  | ∅       | 0.40  | ∅                                         | 0.01  | ∅       | -0.39 |
|               | <i>S. aureus</i>      | ∅                                                                               | -0.69 | ↓↓↓     | 1.44  | ∅                                         | -0.40 | ∅       | -0.05 |
|               | <i>S. epidermidis</i> | ∅                                                                               | -0.03 | ∅       | 1.72  | ∅                                         | -1.47 | ∅       | -1.14 |
|               | <i>C. albicans</i>    | ∅                                                                               | -0.79 | ↑↑      | -1.24 | ∅                                         | -0.22 | ∅       | -0.58 |
| <b>IL10</b>   | <i>E. coli</i>        | ∅                                                                               | 0.30  | ∅       | -0.17 | ∅                                         | -0.11 | ∅       | -0.40 |
|               | <i>S. aureus</i>      | ∅                                                                               | -0.18 | ∅       | 0.31  | ∅                                         | 0.46  | ∅       | 0.34  |
|               | <i>S. epidermidis</i> | ∅                                                                               | -0.35 | ∅       | -0.51 | ∅                                         | -0.06 | ∅       | -0.44 |
|               | <i>C. albicans</i>    | ∅                                                                               | 0.47  | ∅       | -0.26 | ∅                                         | 0.25  | ∅       | 0.06  |
| <b>TLR2</b>   | <i>E. coli</i>        | ∅                                                                               | 0.04  | ∅       | -0.41 | ∅                                         | 0.14  | ∅       | 0.05  |
|               | <i>S. aureus</i>      | ∅                                                                               | -0.14 | ∅       | 0.01  | ∅                                         | 0.18  | ∅       | 0.47  |
|               | <i>S. epidermidis</i> | ∅                                                                               | -0.49 | ∅       | 0.13  | ∅                                         | -0.51 | ∅       | 0.13  |
|               | <i>C. albicans</i>    | ∅                                                                               | 0.08  | ∅       | -0.10 | ∅                                         | 0.18  | ↓       | 0.50  |
| <b>TLR4</b>   | <i>E. coli</i>        | ∅                                                                               | -0.42 | ∅       | -0.42 | ∅                                         | 0.41  | ∅       | 0.41  |
|               | <i>S. aureus</i>      | ∅                                                                               | 0.02  | ∅       | 0.02  | ∅                                         | 0.46  | ∅       | 0.46  |
|               | <i>S. epidermidis</i> | ∅                                                                               | -0.94 | ∅       | -0.94 | ∅                                         | -0.62 | ∅       | -0.62 |
|               | <i>C. albicans</i>    | ∅                                                                               | 0.39  | ∅       | 0.39  | ∅                                         | 1.24  | ∅       | 1.24  |
| <b>RELA</b>   | <i>E. coli</i>        | ∅                                                                               | -0.09 | ∅       | -0.28 | ∅                                         | 0.46  | ∅       | -0.48 |
|               | <i>S. aureus</i>      | ∅                                                                               | -0.10 | ∅       | 0.14  | ∅                                         | 0.05  | ∅       | 0.11  |
|               | <i>S. epidermidis</i> | ∅                                                                               | -0.52 | ∅       | -0.36 | ∅                                         | -0.42 | ∅       | -0.44 |
|               | <i>C. albicans</i>    | ∅                                                                               | 0.47  | ∅       | -0.07 | ∅                                         | 0.65  | ∅       | -0.35 |
| <b>NFKBIA</b> | <i>E. coli</i>        | ∅                                                                               | 0.04  | ∅       | -0.05 | ∅                                         | 0.29  | ∅       | -0.04 |
|               | <i>S. aureus</i>      | ∅                                                                               | -0.16 | ↓       | 0.53  | ∅                                         | 0.32  | ∅       | 0.54  |
|               | <i>S. epidermidis</i> | ∅                                                                               | -0.32 | ∅       | 0.49  | ∅                                         | -0.42 | ∅       | -0.02 |
|               | <i>C. albicans</i>    | ∅                                                                               | -0.17 | ∅       | -0.07 | ∅                                         | 0.59  | ∅       | 0.21  |
| <b>DUSP1</b>  | <i>E. coli</i>        | ∅                                                                               | 0.22  | ∅       | 0.11  | ∅                                         | 0.05  | ∅       | -0.69 |
|               | <i>S. aureus</i>      | ∅                                                                               | -0.15 | ∅       | 0.66  | ∅                                         | -0.25 | ∅       | -0.20 |
|               | <i>S. epidermidis</i> | ∅                                                                               | 0.03  | ∅       | 0.22  | ∅                                         | -0.77 | ∅       | -0.53 |
|               | <i>C. albicans</i>    | ↓                                                                               | 0.27  | ∅       | 0.30  | ∅                                         | -0.18 | ∅       | -0.46 |
| <b>CASP1</b>  | <i>E. coli</i>        | ∅                                                                               | 0.03  | ∅       | -0.26 | ∅                                         | 0.26  | ∅       | -0.25 |
|               | <i>S. aureus</i>      | ∅                                                                               | -0.03 | ∅       | 0.01  | ∅                                         | 0.47  | ∅       | 0.28  |
|               | <i>S. epidermidis</i> | ∅                                                                               | -0.23 | ∅       | -0.15 | ∅                                         | -0.30 | ∅       | -0.14 |
|               | <i>C. albicans</i>    | ∅                                                                               | 0.05  | ∅       | -0.27 | ∅                                         | 0.21  | ∅       | 0.03  |



|              |                              |   |       |   |       |   |       |   |       |
|--------------|------------------------------|---|-------|---|-------|---|-------|---|-------|
| <b>NLRP3</b> | <b><i>E. coli</i></b>        | ∅ | 0.16  | ∅ | 0.04  | ∅ | -0.09 | ∅ | -0.57 |
|              | <b><i>S. aureus</i></b>      | ∅ | -0.24 | ↓ | 0.96  | ∅ | 0.11  | ∅ | -0.20 |
|              | <b><i>S. epidermidis</i></b> | ∅ | 0.06  | ∅ | 0.69  | ∅ | -0.44 | ∅ | -0.51 |
|              | <b><i>C. albicans</i></b>    | ∅ | -0.37 | ∅ | -0.32 | ∅ | 0.06  | ∅ | -0.28 |

Cord blood (n=10) was stimulated with live microorganisms (*E. coli* 10<sup>4</sup> CFU/ml, *S. aureus* 10<sup>5</sup> CFU/ml, *S. epidermidis* 10<sup>5</sup> CFU/ml, *C. albicans* 10<sup>5</sup> CFU/ml) and simultaneously treated with PTX (200 μM), antimicrobial agents (GEN, VAN or AMB), or PTX and antimicrobial agents combined, and cultured for 4 hours at 37 ° in 5% CO<sub>2</sub>. Mean  $\Delta\Delta C_T$  values of samples treated with combined PTX and antimicrobial agents compared to PTX or antimicrobial agents alone (reference samples). ↑ significant upregulation, ↓ significant downregulation, and ∅ unchanged mRNA expression compared to reference samples, with the number of symbols representing the level of significance ( $p \leq 0.05$ ,  $p \leq 0.01$ , and  $p \leq 0.001$ , respectively).

<sup>a</sup> p-values were based on linear mixed model t-tests and adjusted for multiple comparisons employing false discovery rates.
